# Supplementary material for: Higher CSF sTNFR1-related proteins associate with better prognosis in very early Alzheimer’s disease
Source: PubMed Central journal article supplement (PMC8238986; doi:10.1038/s41467-021-24220-7), 2021-06-28
Supplement: 41467_2021_24220_MOESM1_ESM.pdf [file 41467_2021_24220_MOESM1_ESM.pdf]

## Supplementary Information

### Higher CSF sTNFR1-related proteins associate with better prognosis in very early Alzheimer's disease

**Authors:** William T. Hu, Tugba Ozturk, Alexander Kollhoff, Whitney Wharton, J. Christina Howell, Alzheimer's Disease Neuroimaging Initiative  
Corresponding author: William T. Hu, William.hu@rutgers.edu

### Supplementary Methods

Cohort B (NCT02089555; PI: WTH) sought to recruit older White and Black American participants with NC, MCI, and AD dementia in Georgia. Inclusion criteria included: age 60-85 (inclusive); has normal cognition, a diagnosis of mild cognitive impairment, or a diagnosis of Alzheimer's disease; self-reported race of Black/African American or non-Hispanic white; able to undergo neuropsychological testing, lumbar puncture, and MRI; and English speaking.

Exclusion criteria include: history of large territory stroke; diagnosis of Parkinson's disease, amyotrophic lateral sclerosis, or another progressive neurological disorder which may spare cognition; Mini-Mental State Examination score < 17.

Cohort C (NCT00135226; PI: WW) sought to recruit middle-aged to older white and Black participants with NC and family history of dementia in Georgia. Inclusion criteria included: age 45 – 65 (inclusive); a biological parent with AD dementia; willing to fast for eight hours; willing to undergo all procedures including LP. Exclusion Criteria: contraindication for LP; history of neurologic disease or significant head trauma; major untreated depression within two years; history of alcohol or substance abuse; any significant systemic illness or unstable medical condition which could affect cognition or cause difficulty complying with the protocol; diagnosis

of MCI, AD dementia, or residence in a skilled nursing facility; use of investigational medication; unwillingness to fast.

**Supplementary Fig 1. Between-subject variability of cognitive decline in ADNI.** Longitudinal CDR-SB changes up to 120 months following CSF collection according to clinical diagnosis of NC (a), MCI (b), and AD dementia (c) showed great between-subject variability even after incorporating predicted ADNC status (CSF t-Tau/A $\beta$ 42 levels relative to 0.39<sup>1</sup>).

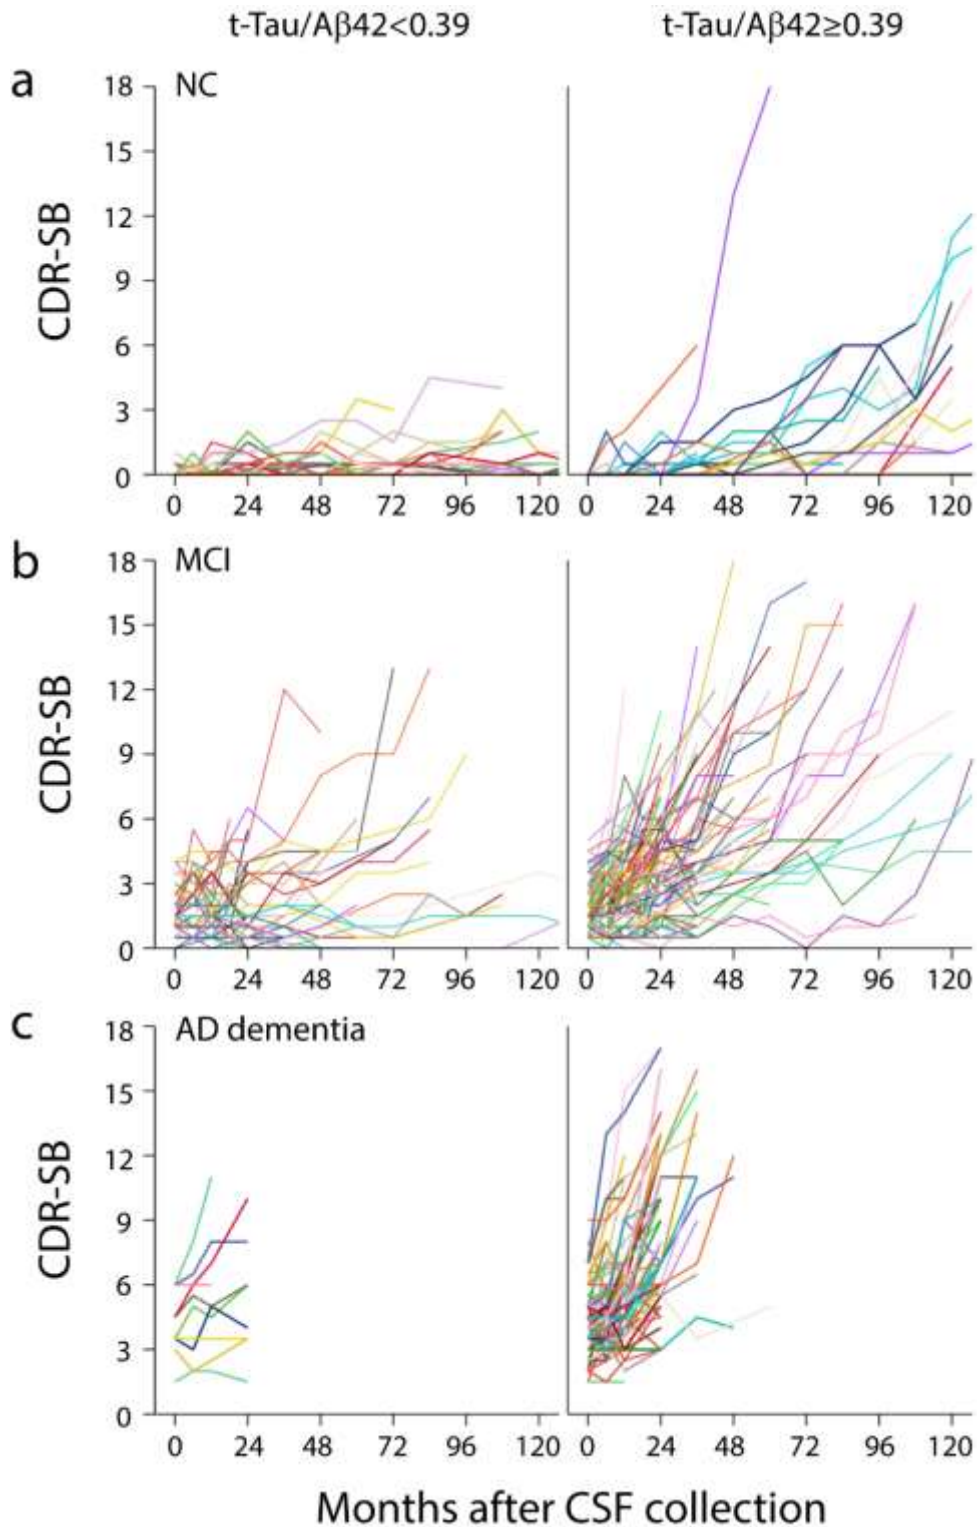

Supplementary Fig 2. Frequency of baseline CDR-SB scores according to baseline diagnosis.

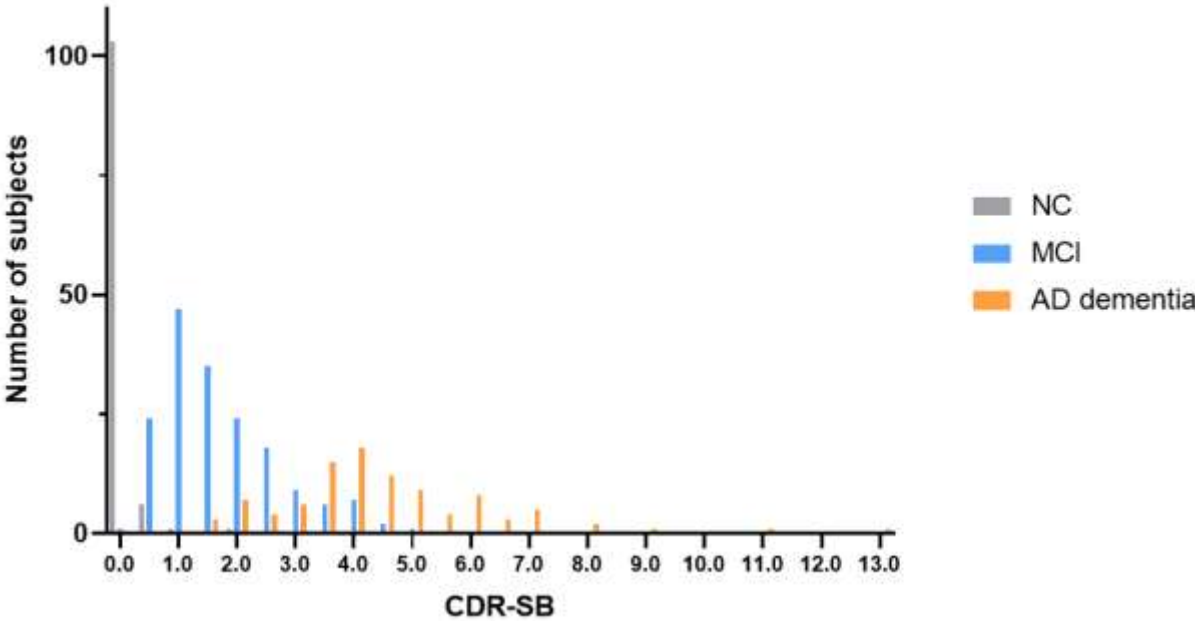

**Supplementary Table 1.** Linear mixed modeling of longitudinal CDR-SB changes according to basic baseline factors across the entire cohort. Significant interaction terms between Time (measured in months) and baseline factors are interpreted as baseline factors' effects on the CDR-SB slope of change over time.

|                                     | B (95% confidence interval) | P      |
|-------------------------------------|-----------------------------|--------|
| Baseline diagnosis                  |                             |        |
| NC                                  | Reference                   |        |
| MCI                                 | 1.552 (1.223, 1.880)        | <0.001 |
| AD dementia                         | 4.348 (3.938, 4.758)        | <0.001 |
| Baseline diagnosis X Months         |                             |        |
| NC                                  | Reference                   |        |
| MCI                                 | 0.030 (0.001, 0.059)        | 0.043  |
| AD dementia                         | 0.076 (0.016, 0.137)        | 0.013  |
| Age                                 | 0.002 (-0.016, 0.021)       | 0.793  |
| Age X Months                        | 0.002 (0.002, 0.003)        | <0.001 |
| Female sex                          | 0.096 (-0.372, 0.180)       | 0.495  |
| Female sex X Months                 | 0.015 (-0.003, 0.034)       | 0.104  |
| Education                           | 0.032 (-0.013, 0.077)       | 0.166  |
| Education X Months                  | 0.002 (-0.001, 0.005)       | 0.201  |
| Predicted ADNC                      | 0.046 (-0.274, 0.367)       | 0.775  |
| Predicted ADNC X Months             | 0.020 (-0.012, 0.052)       | 0.216  |
| Predicted ADNC X Diagnosis X Months |                             |        |
| NC                                  | Reference                   |        |
| MCI                                 | 0.048(0.007, 0.089)         | 0.020  |
| AD dementia                         | 0.070 (0.001, 0.138)        | 0.045  |

**Supplementary Table 2.** Mean and standard deviation values for log<sub>10</sub>-transformed cytokine values from ADNI NC participants.

|                                           | <b>Mean ± SD</b> |
|-------------------------------------------|------------------|
| log <sub>10</sub> (t-Tau)                 | 1.808±0.172      |
| log <sub>10</sub> (p-Tau <sub>181</sub> ) | 1.344±0.202      |
| log <sub>10</sub> (MSD-sTREM2 MSD)        | 3.556±0.238      |
| log <sub>10</sub> (WU-sTREM2)             | 2451±762         |
| log <sub>10</sub> (MSD-GRN)               | 3.180±0.108      |
| log <sub>10</sub> (TNFα)                  | 0.233±0.173      |
| log <sub>10</sub> (sTNFR1)                | 2.924±0.116      |
| log <sub>10</sub> (sTNFR2)                | 2.999±0.132      |
| log <sub>10</sub> (sVCAM1)                | 4.569±0.199      |
| log <sub>10</sub> (sICAM1)                | 2.503±0.206      |
| log <sub>10</sub> (IL-6)                  | 0.513±0.224      |
| log <sub>10</sub> (IL-7)                  | -0.068±0.432     |
| log <sub>10</sub> (IL-9)                  | 0.513±0.224      |
| log <sub>10</sub> (IL-10)                 | 0.722±0.187      |
| log <sub>10</sub> (IL12-p40)              | -0.480±1.006     |
| log <sub>10</sub> (IL-21)                 | 0.737±0.712      |
| log <sub>10</sub> (IP-10)                 | 3.712±0.151      |
| log <sub>10</sub> (TGFβ1)                 | 2.005±0.171      |
| log <sub>10</sub> (TGFβ2)                 | 2.188±0.110      |
| log <sub>10</sub> (TGFβ3)                 | 0.555±0.403      |

**Supplementary Table 3.** Relationship between CSF cytokine levels, clinical diagnosis, and CSF biomarker profile using ANCOVA adjusting for age, sex, and *APOE*  $\epsilon$ 4 status (F- and p-values are shown;  $p < 0.01$  used as threshold to adjust for multiple comparisons). Among the 15 CSF inflammatory proteins analyzed in this cohort, CSF levels of four analytes – sTNF-R1, sTNF-R2, TGF- $\beta$ 1, and sICAM1 – differed according to predicted ADNC status ( $p < 0.001$  for all), and TGF-  $\beta$ 2 levels differed according to baseline diagnosis ( $p = 0.006$ ). As expected for the core CSF AD biomarkers, A $\beta$ 42 levels differed according to baseline diagnosis ( $p = 0.002$ ), and levels of all three markers (A $\beta$ 42, t-Tau, p-Tau<sub>181</sub>,  $p < 0.001$ ) differed according to predicted ADNC status. Neither sTREM2 or progranulin levels varied according to baseline diagnosis or predicted ADNC status in this cohort.

|                      | Diagnosis    | t-Tau/A $\beta$ 42 $\geq$ 0.39 | Diagnosis X<br>t-Tau/A $\beta$ 42 $\geq$ 0.39 |
|----------------------|--------------|--------------------------------|-----------------------------------------------|
| TNF- $\alpha$        | 1.153, 0.317 | 1.598, 0.207                   | 0.119, 0.888                                  |
| sTNFR1               | 2.248, 0.107 | 17.473, <0.001                 | 1.927, 0.147                                  |
| sTNRF2               | 2.016, 0.135 | 22.298, <0.001                 | 0.670, 0.513                                  |
| IL-6                 | 1.597, 0.204 | 0.003, 0.956                   | 3.031, 0.050                                  |
| IL-7                 | 0.152, 0.859 | 2.995, 0.084                   | 0.661, 0.517                                  |
| IL-12p40             | 1.486, 0.228 | 0.314, 0.576                   | 0.438, 0.646                                  |
| IP-10                | 0.612, 0.543 | 3.747, 0.054                   | 0.364, 0.695                                  |
| IL-10                | 0.177, 0.838 | 0.071, 0.789                   | 0.081, 0.923                                  |
| IL-9                 | 2.574, 0.078 | 6.647, 0.010                   | 0.155, 0.856                                  |
| IL-21                | 0.947, 0.389 | 3.892, 0.049                   | 1.336, 0.264                                  |
| TGF $\beta$ 1        | 2.460, 0.087 | 12.845, <0.001                 | 1.685, 0.187                                  |
| TGF $\beta$ 2        | 5.112, 0.006 | 3.944, 0.048                   | 2.737, 0.066                                  |
| TGF $\beta$ 3        | 0.993, 0.372 | 2.896, 0.090                   | 3.031, 0.049                                  |
| sICAM1               | 1.313, 0.270 | 14.029, <0.001                 | 0.242, 0.785                                  |
| sVCAM1               | 0.024, 0.976 | 4.068, 0.044                   | 2.543, 0.080                                  |
| MSD-sTREM2           | 0.188, 0.829 | 1.082, 0.299                   | 0.485, 0.616                                  |
| WU-sTREM2            | 0.355, 0.701 | 2.532, 0.113                   | 0.247, 0.782                                  |
| progranulin          | 0.173, 0.841 | 0.277, 0.599                   | 0.314, 0.730                                  |
| A $\beta$ 42         | 6.321, 0.002 | 196.192, <0.001                | 2.414, 0.091                                  |
| t-Tau                | 3.058, 0.048 | 208.161, <0.001                | 3.212, 0.041                                  |
| p-Tau <sub>181</sub> | 1.411, 0.245 | 160.684, <0.001                | 3.024, 0.050                                  |

**Supplementary Table 4.** PCA of MCI participants from ADNI, showing loading ( $\geq 0.100$ ) with missing values excluded (loading with missing values replaced with means in parentheses).

|                      | PC1                | PC2              | PC3                | PC4              | PC5                | PC6              | PC7                | PC8                |
|----------------------|--------------------|------------------|--------------------|------------------|--------------------|------------------|--------------------|--------------------|
| t-Tau                | 0.871<br>(0.871)   | 0.356<br>(0.331) |                    |                  |                    |                  |                    |                    |
| p-Tau <sub>181</sub> | 0.866<br>(0.906)   | 0.128<br>(0.102) |                    |                  |                    |                  |                    |                    |
| A $\beta$ 42         | -0.745<br>(-0.792) | 0.343<br>(0.348) | -0.142             | -0.141           |                    |                  |                    | 0.118              |
| t-Tau/A $\beta$ 42   | 0.675<br>(0.922)   | 0.244<br>(0.161) |                    |                  | 0.123              |                  |                    |                    |
| sTNFR1               | 0.137<br>(0.173)   | 0.903<br>(0.848) | 0.281<br>(0.297)   |                  |                    | 0.144<br>(0.127) | 0.124<br>(0.122)   |                    |
| sTNRF2               | 0.255<br>(0.223)   | 0.883<br>(0.785) | 0.343<br>(0.324)   | (0.219)          |                    | (0.107)          | 0.226<br>(0.167)   |                    |
| sVCAM1               |                    | 0.869<br>(0.836) | 0.202<br>(0.168)   | 0.165<br>(0.135) |                    |                  | 0.161              | 0.124<br>(0.166)   |
| sICAM1               | 0.333<br>(0.292)   | 0.467<br>(0.468) |                    | (0.150)          | -0.198             | 0.378<br>(0.211) | 0.199<br>(0.126)   | -0.624<br>(-0.581) |
| IP-10                | -0.136<br>(-0.102) | 0.186<br>(0.224) | 0.255<br>(0.268)   |                  | -0.153<br>(-0.120) | (0.119)          | 0.705<br>(0.672)   | 0.100<br>(0.139)   |
| MSD-sTREM2           |                    | 0.471<br>(0.383) | 0.883<br>(0.789)   | (0.135)          |                    | 0.199<br>(0.132) | 0.151              |                    |
| WU-sTREM2            |                    | 0.263<br>(0.215) | 0.882<br>(0.850)   |                  |                    |                  | 0.212<br>(0.170)   | -0.142             |
| progranulin          |                    | 0.588<br>(0.325) |                    | 0.530<br>(0.662) |                    | (-0.206)         | (0.126)            | (0.174)            |
| IL-6                 |                    |                  |                    | 0.799<br>(0.824) |                    | 0.109<br>(0.155) | (-0.118)           | (-0.107)           |
| IL-10                | -0.118<br>(-0.119) | 0.155<br>(0.125) | 0.212<br>(0.150)   | 0.662<br>(0.725) | -0.158             |                  | 0.459<br>(0.459)   |                    |
| TGF $\beta$ 2        |                    | (-0.188)         |                    |                  | 0.820<br>(0.903)   |                  | -0.150<br>(-0.124) |                    |
| TGF $\beta$ 1        | 0.137              | 0.469<br>(0.510) |                    |                  | 0.354<br>(0.694)   | 0.270            | (0.134)            | -0.112<br>(-0.159) |
| TGF $\beta$ 3        | 0.176              |                  | -0.128<br>(-0.128) |                  | 0.538<br>(0.612)   |                  |                    |                    |
| IL-7                 |                    | -0.116           |                    | 0.284<br>(0.283) | -0.103             | 0.810<br>(0.769) | 0.245              | 0.393<br>(0.244)   |
| TNF- $\alpha$        |                    | 0.378<br>(0.331) |                    | 0.157<br>(0.506) |                    | 0.429<br>(0.435) | 0.610<br>(0.382)   |                    |
| IL-9                 | (0.100)            | 0.288<br>(0.230) | (0.143)            | (-0.195)         |                    | 0.601<br>(0.739) | 0.155<br>(0.199)   | -0.105<br>(-0.120) |
| IL12-p40             | 0.123              |                  |                    | (0.141)          |                    | 0.223<br>(0.112) | 0.772<br>(0.849)   |                    |
| IL-21                |                    | 0.153            | (-0.112)           |                  |                    | (0.106)          |                    | 0.904<br>(0.924)   |



**Supplementary Table 5.** Demographic, clinical, and biomarker information for Cohorts B & C. \* AD biomarkers were measured using Luminex (Alzbio3, Fujirebio Diagnostics, Malvern, PA) in Cohort B, and ELISA (InnoTest Fujirebio Diagnostics) in Cohort C. The absolute values are well-characterized to result from differences in antibody pairing and assay platforms, and ELISA measures are converted to equivalent Luminex measures using a validated conversion formula.<sup>2</sup> † A threshold of t-Tau/A $\beta$ 42  $\geq$ 0.39 for Luminex-derived measures based on a previous autopsy-derived series<sup>1</sup> was selected.

|                                                        | Cohort B<br>(n=126) | Cohort C<br>(n=68) |
|--------------------------------------------------------|---------------------|--------------------|
| Male (%)                                               | 56 (44%)            | 24 (35%)           |
| Age, mean (SD)                                         | 70.0 (7.6)          | 58.9 (6.8)         |
| Education, mean (SD)                                   | 15.7 (2.9)          | N.A.               |
| Race                                                   |                     |                    |
| Asian (%)                                              | 0                   | 0                  |
| Black/African American (%)                             | 58 (46%)            | 21 (31%)           |
| Non-Hispanic white (%)                                 | 68 (54%)            | 47 (69%)           |
| Non-Hispanic (%)                                       | 126 (100%)          | 68 (100%)          |
| Having at least one APOE $\epsilon$ 4 allele (%)       | 64/124 (51%)        | 33 (48%)           |
| Diagnosis                                              |                     |                    |
| NC                                                     | 51 (40%)            | 68 (100%)          |
| MCI                                                    | 50 (40%)            | 0                  |
| AD dementia                                            | 25 (20%)            | 0                  |
| CSF biomarkers                                         |                     |                    |
| A $\beta$ 42, mean (SD) in pg/mL                       | 210.3 (133.8)       | 709.4 (186.7)*     |
| t-Tau, mean (SD) in pg/mL                              | 60.2 (42.6)         | 295.9 (161.9)*     |
| p-Tau <sub>181</sub> , mean (SD) in pg/mL              | 22.1 (11.8)         | 48.4 (20.5)*       |
| t-Tau/A $\beta$ 42 consistent with AD <sup>†</sup> (%) | 47 (37%)            | 8 (12%)*           |
| sTREM2, mean (SD) in pg/mL                             | 339.1 (115.6)       | 340.2 (116.2)      |
| TNF- $\alpha$ , mean (SD) in pg/mL                     | 2.13 (0.78)         | 1.17 (0.85)        |
| sTNFR1, mean (SD) in pg/mL                             | 622 (184)           | 570 (162)          |
| sTNFR2, mean (SD) in pg/mL                             | 878 (308)           | 706 (222)          |
| TGF $\beta$ 1, mean (SD) in pg/mL                      | N.D.                | N.D.               |
| TGF $\beta$ 2, mean (SD) in pg/mL                      | N.D.                | N.D.               |
| TGF $\beta$ 3, mean (SD) in pg/mL                      | N.D.                | N.D.               |
| IP-10, mean (SD) in ng/mL                              | 3.61 (1.89)         | N.D.               |
| IL-6, mean (SD) in pg/mL                               | N.D.                | N.D.               |
| IL-7, mean (SD) in pg/mL                               | 3.54 (2.13)         | 1.65 (0.79)        |
| IL-9, mean (SD) in pg/mL                               | 2.78 (1.97)         | 3.66 (2.06)        |
| IL-10, mean (SD) in pg/mL                              | 7.25 (3.60)         | 5.74 (2.52)        |
| IL-12p40, mean (SD) in pg/mL                           | N.D.                | N.D.               |
| IL-21, mean (SD) in pg/mL                              | N.D.                | N.D.               |
| sICAM-1, mean (SD) in pg/mL                            | 139.3 (88.0)        | 299.0 (160.0)      |
| sVCAM-1, mean (SD) in ng/mL                            | 18.2 (9.9)          | 24.9 (10.7)        |

**Supplementary Table 6.** MCI models of longitudinal ADNI-Mem-EF changes using biomarker family scores (from PCA), 0-60 months after CSF collection ( $\Delta AIC=11.7$ , significant factors highlighted in blue with  $p<0.00625$  used for CSF biomarkers to adjust for multiple comparisons).

|                                  | AIC = 386.4                  |        | AIC = 374.7                   |        |
|----------------------------------|------------------------------|--------|-------------------------------|--------|
|                                  | B (95% CI)                   | P      | B (95% CI)                    | P      |
| Months                           | 0.013 (-0.012, 0.038)        | 0.298  | 0.028 (0.002, 0.054)          | 0.033  |
| Baseline Cognitive Z             | 0.942 (0.890, 0.995)         | <0.001 | 0.943 (0.911, 0.996)          | <0.001 |
| Baseline Cognitive Z X Months    | 0.0054<br>(0.0006, 0.0101)   | 0.027  | 0.004<br>(0, 0.009)           | 0.070  |
| Female sex                       | 0.011 (-0.053, 0.075)        | 0.734  | 0.013 (-0.052, 0.078)         | 0.695  |
| Female sex X Months              | -0.008 (-0.014, -0.003)      | 0.004  | -0.006 (-0.012, 0.001)        | 0.019  |
| Age                              | 0 (-0.004, 0.004)            | 0.898  | 0 (-0.004, 0.005)             | 0.871  |
| Age X Months                     | -0.0004<br>(-0.0008, 0.0001) | 0.006  | -0.0006<br>(-0.0009, -0.0003) | <0.001 |
| <i>APOE</i> $\epsilon 4+$        | 0.075 (0.010, 0.140)         | 0.023  | 0.057 (0, 0.116)              | 0.060  |
| AD score                         | -0.048 (-0.081, -0.015)      | 0.005  | -0.046 (-0.080, -0.011)       | 0.009  |
| AD score X Months                | -0.006 (-0.009, -0.003)      | <0.001 | -0.008 (-0.011, -0.005)       | <0.001 |
| sTNFR1 score                     |                              |        | -0.010 (-0.042, 0.022)        | 0.547  |
| sTNFR1 score X Months            |                              |        | 0.005 (0.002, 0.008)          | <0.001 |
| AD score X sTNFR1 score          |                              |        | 0.007 (-0.026, 0.040)         | 0.667  |
| AD score X sTNFR1 score X Months |                              |        | 0.002 (0, 0.005)              | 0.078  |

**Supplementary Table 7.** MCI models of longitudinal CDR-SB changes using biomarker scores (from PCA), 0-60 months after CSF collection ( $\Delta AIC=8.2$  for biomarker family scores when sTNFR1 score was introduced). Using p-Tau<sub>181</sub> and sTNFR1 levels showed similar results ( $\Delta AIC=16.5$ ). Significant factors are highlighted in blue at  $p<0.00625$  for CSF biomarker PC score/biomarkers to adjust for multiple comparisons).

|                          | AIC=2842.3             |        | AIC = 2834.1            |        |
|--------------------------|------------------------|--------|-------------------------|--------|
|                          | B (95% CI)             | P      | B (95% CI)              | P      |
| Months                   | -0.094 (-0.203, 0.014) | 0.090  | -0.158 (-0.272, -0.045) | 0.006  |
| Baseline CDR-SB          | 0.912 (0.804, 1.019)   | <0.001 | 0.906 (0.799, 1.013)    | <0.001 |
| Baseline CDR-SB X Months | 0.013 (0.001, 0.026)   | 0.032  | 0.012 (0, 0.024)        | 0.059  |
| Age                      | 0.005 (-0.008, 0.018)  | 0.466  | 0.007 (-0.007, 0.022)   | 0.339  |
| Age X Months             | 0.002 (0.001, 0.003)   | 0.003  | 0.003 (0.001, 0.004)    | <0.001 |
| Core AD score            | -0.061 (-0.164, 0.041) | 0.241  | -0.060 (-0.163, 0.042)  | 0.246  |
| Core AD score X Months   | 0.028 (0.016, 0.040)   | <0.001 | 0.029 (0.017, 0.040)    | <0.001 |
| sTNFR1 score             |                        |        | -0.026 (-0.139, 0.086)  | 0.642  |
| sTNFR1 score X Months    |                        |        | -0.020 (-0.033, -0.008) | 0.002  |

|                                           | AIC=2836.2              |        | AIC = 2819.7            |        |
|-------------------------------------------|-------------------------|--------|-------------------------|--------|
|                                           | B (95% CI)              | P      | B (95% CI)              | P      |
| Months                                    | -0.126 (-0.238, -0.014) | 0.028  | -0.187 (-0.306, -0.068) | 0.002  |
| Baseline CDR-SB                           | 0.903 (0.795, 1.010)    | <0.001 | 0.905 (0.793, 1.016)    | <0.001 |
| Baseline CDR-SB X Months                  | 0.017 (0.004, 0.030)    | 0.008  | 0.016 (0.004, 0.029)    | 0.010  |
| Age                                       | 0.004 (-0.010, 0.018)   | 0.579  | 0.004 (-0.012, 0.020)   | 0.626  |
| Age X Months                              | 0.002 (0.001, 0.004)    | 0.002  | 0.003 (0.001, 0.004)    | <0.001 |
| APOE $\epsilon 4+$                        | -0.107 (-0.329, 0.115)  | 0.345  | -0.106 (-0.336, 0.123)  | 0.363  |
| APOE $\epsilon 4+$ X Months               | 0.032 (0.007, 0.058)    | 0.012  | 0.032 (0.007, 0.057)    | 0.011  |
| $z\log_{10}(p\text{-Tau}_{181})$          | -0.050 (-0.154, 0.054)  | 0.345  | -0.047 (-0.158, 0.065)  | 0.411  |
| $z\log_{10}(p\text{-Tau}_{181})$ X Months | 0.009 (0.001, 0.017)    | 0.026  | 0.011 (0.003, 0.019)    | 0.007  |
| $z\log_{10}(sTNFR1)$                      |                         |        | 0.014 (-0.115, 0.144)   | 0.825  |
| $z\log_{10}(sTNFR1)$ X Months             |                         |        | -0.021 (-0.034, -0.007) | 0.004  |

**Supplementary Table 8.** AD dementia models of longitudinal cognitive decline using biomarker scores, with average ADNI-Mem-EF or CDR-SB as outcome, 0-36 months ( $\Delta$ AIC=9.56 and 8.20; significant factors highlighted in blue with  $p < 0.00625$  used for CSF biomarkers to adjust for multiple comparisons).

|                                  | AIC = 92.29             |        | AIC = 82.73             |        |
|----------------------------------|-------------------------|--------|-------------------------|--------|
|                                  | B (95% CI)              | P      | B (95% CI)              | P      |
| Months                           | -0.086 (-0.137, -0.036) | 0.001  | -0.070 (-0.121, -0.020) | 0.007  |
| Baseline ADNI-Mem-EF             | 0.999 (0.947, 1.051)    | <0.001 | 0.997 (0.946, 1.047)    | <0.001 |
| Age                              | 0.001 (-0.003, 0.006)   | 0.542  | 0.001 (-0.004, 0.005)   | 0.760  |
| Age X Months                     | 0.0008 (0.0002, 0.0015) | 0.015  | 0.0006 (0, 0.0012)      | 0.070  |
| APOE $\epsilon$ 4+               | 0.079 (0.010, 0.149)    | 0.032  | 0.072 (0.004, 0.140)    | 0.038  |
| Core AD biomarker score          | -0.003 (-0.040, 0.033)  | 0.852  | -0.004 (-0.040, 0.032)  | 0.832  |
| Core AD biomarker score X Months | -0.003 (-0.008, 0.002)  | 0.177  | -0.004 (-0.009, 0.001)  | 0.115  |
| sTREM2 score                     |                         |        | 0.027 (-0.008, 0.062)   | 0.127  |
| sTREM2 score X Months            |                         |        | 0.006 (0.001, 0.011)    | 0.015  |

|                                  | AIC = 1181.0           |        | AIC = 1172.8            |        |
|----------------------------------|------------------------|--------|-------------------------|--------|
|                                  | B (95% CI)             | P      | B (95% CI)              | P      |
| Months                           | 0.034 (-0.042, 0.110)  | 0.375  | 0.040 (-0.033, 0.111)   | 0.283  |
| Baseline CDR-SB                  | 0.968 (0.875, 1.060)   | <0.001 | 0.968 (0.876, 1.061)    | <0.001 |
| Baseline CDR-SB X Months         | 0.028 (0.012, 0.045)   | 0.001  | 0.028 (0.012, 0.043)    | 0.001  |
| Core AD biomarker score          | -0.087 (-0.256, 0.081) | 0.306  | -0.091 (-0.259, 0.077)  | 0.285  |
| Core AD biomarker score X Months | 0.024 (-0.002, 0.050)  | 0.070  | 0.024 (0, 0.005)        | 0.050  |
| sTREM2 score                     |                        |        | 0.004 (-0.162, 0.170)   | 0.964  |
| sTREM2 score X Months            |                        |        | -0.040 (-0.065, -0.016) | 0.001  |

**Supplementary Table 9.** NC model – ADNI-Mem-EF as outcome, 0-60 months ( $\Delta$ AIC=6.0, significant factors highlighted in blue with  $p < 0.00625$  used for CSF biomarkers to adjust for multiple comparisons).

|                                           | AIC = 229.36             |        | AIC = 223.35                  |        |
|-------------------------------------------|--------------------------|--------|-------------------------------|--------|
|                                           | B (95% CI)               | P      | B (95% CI)                    | P      |
| Month                                     | 0.076 (0.017, 0.134)     | 0.011  | 0.102 (0.046, 0.158)          | <0.001 |
| Month <sup>2</sup>                        | -0.001 (-0.002, 0)       | 0.025  | -0.0016<br>(-0.0026, -0.0007) | <0.001 |
| Baseline ADNI-Mem-EF                      | 0.983 (0.889, 1.077)     | <0.001 | 0.982 (0.889, 1.075)          | <0.001 |
| Baseline ADNI-Mem-EF X Month              | -0.018 (-0.026, -0.010)  | <0.001 | -0.019 (-0.027, -0.011)       | <0.001 |
| Baseline ADNI-Mem-EF X Month <sup>2</sup> | 0.0004 (0.0002, 0.0005)  | <0.001 | 0.0004 (0.0002, 0.0005)       | <0.001 |
| Age                                       | -0.003 (-0.011, 0.005)   | 0.465  | -0.002 (-0.011, 0.006)        | 0.541  |
| Age X Month                               | -0.008 (-0.014, 0)       | 0.036  | -0.001 (-0.002, 0)            | 0.004  |
| Age X Month <sup>2</sup>                  | 1.0E-5 (-1.9E-6, 2.2E-5) | 0.098  | 1.5E-5 (3.4E-6, 2.7E-5)       | 0.012  |
| Male sex                                  | -0.008 (-0.097, 0.081)   | 0.859  |                               |        |
| Male sex X Months                         | 0.007 (-0.001, 0.014)    | 0.093  |                               |        |
| Male sex X Months <sup>2</sup>            | -0.0001 (-0.0002, 0)     | 0.065  |                               |        |
| Core AD score                             | 0.007 (-0.032, 0.046)    | 0.737  | 0.004 (-0.035, 0.044)         | 0.825  |
| Core AD score x Month                     | -0.003 (-0.005, -0.002)  | 0.001  | -0.003 (-0.005, -0.001)       | 0.001  |
| IL6 score                                 |                          |        | -0.013 (-0.058, 0.030)        | 0.546  |
| IL6 score X Month                         |                          |        | 0.005 (0.002, 0.009)          | 0.005  |
| IL6 score X Month <sup>2</sup>            |                          |        | -8.5E-5 (-1.4E-4, -3E-5)      | 0.004  |

### Supplementary References

- 1 Shaw, L. M. *et al.* Cerebrospinal fluid biomarker signature in Alzheimer's disease neuroimaging initiative subjects. *Ann Neurol* **65**, 403-413, doi:10.1002/ana.21610 (2009).
- 2 Irwin, D. J. *et al.* Comparison of cerebrospinal fluid levels of tau and Abeta 1-42 in Alzheimer disease and frontotemporal degeneration using 2 analytical platforms. *Arch Neurol* **69**, 1018-1025, doi:10.1001/archneurol.2012.26 (2012).
